# Supplementary material
Source: Royal Society of Chemistry journal article supplement (doi:10.1039/d6ay00478d)
Supplement: d6ay00478d1.pdf [file d6ay00478d1.pdf]

1

## Supplementary Material

2

3 **High-Frequency Ammonium Monitoring in Coastal Seawater via a Flow-Batch**

4 **System Featuring a Heating Reaction Coil**

5 Fanrong Zeng, Kunning Lin\*, Yuanbiao Zhang

6 Third Institute of Oceanography, Ministry of Natural Resources, 361005, Xiamen,

7 Fujian, People's Republic of China.

8

9 \*Corresponding author.

10 E-mail addresses: linkunning@tio.org.cn (K. Lin).

11

12 **Table S1** Analytical procedure for the determination of  $\text{NH}_4^+$ .

| Step  | Syringe pump                                                                                      | Valve position | Flow rate (mL/min) | Operation                                                | Description                                                                                                                         |
|-------|---------------------------------------------------------------------------------------------------|----------------|--------------------|----------------------------------------------------------|-------------------------------------------------------------------------------------------------------------------------------------|
| 1-5   | In                                                                                                | 1              | 30                 | Aspirate 900 $\mu\text{L}$ of sample                     | Washing the syringe, mixing coil and the flow cell with sample for 2 cycles                                                         |
|       | Out                                                                                               | 10             | 60                 | Dispense 900 $\mu\text{L}$ of sample                     |                                                                                                                                     |
|       | In                                                                                                | 10             | 30                 | Aspirate 1000 $\mu\text{L}$ of sample                    |                                                                                                                                     |
|       | Out                                                                                               | 12/11          | 60                 | Dispense 200 $\mu\text{L}$ /800 $\mu\text{L}$ of sample  |                                                                                                                                     |
| 6-11  | In                                                                                                | 1              | 30                 | Aspirate 250 $\mu\text{L}$ of sample                     | Aspirate and mix the sample and <b>CIT solution</b> through the mixing coil and the syringe for 3 cycles                            |
|       | In                                                                                                | 2              | 2                  | Aspirate 80 $\mu\text{L}$ of CIT                         |                                                                                                                                     |
|       | In                                                                                                | 1              | 30                 | Aspirate 250 $\mu\text{L}$ of sample                     |                                                                                                                                     |
|       | Out                                                                                               | 10             | 60                 | Dispense 580 $\mu\text{L}$ of mixture                    |                                                                                                                                     |
|       | In                                                                                                | 10             | 30                 | Aspirate 580 $\mu\text{L}$ of mixture                    |                                                                                                                                     |
|       | Out                                                                                               | 10             | 60                 | Dispense 580 $\mu\text{L}$ of mixture                    |                                                                                                                                     |
| 12-17 | In                                                                                                | 10             | 30                 | Aspirate 290 $\mu\text{L}$ of mixture                    | Aspirate and mix the mixture and <b>OPP solution</b> through the mixing coil and the syringe for 3 cycles                           |
|       | In                                                                                                | 3              | 2                  | Aspirate 20 $\mu\text{L}$ of OPP                         |                                                                                                                                     |
|       | In                                                                                                | 10             | 30                 | Aspirate 290 $\mu\text{L}$ of mixture                    |                                                                                                                                     |
|       | Out                                                                                               | 10             | 60                 | Dispense 600 $\mu\text{L}$ of mixture                    |                                                                                                                                     |
|       | In                                                                                                | 10             | 30                 | Aspirate 600 $\mu\text{L}$ of mixture                    |                                                                                                                                     |
|       | Out                                                                                               | 10             | 60                 | Dispense 600 $\mu\text{L}$ of mixture                    |                                                                                                                                     |
| 18-23 | In                                                                                                | 10             | 30                 | Aspirate 300 $\mu\text{L}$ of mixture                    | Aspirate and mix the mixture and <b>DIC solution</b> through the mixing coil and the syringe for 3 cycles                           |
|       | In                                                                                                | 4              | 2                  | Aspirate 20 $\mu\text{L}$ of DIC                         |                                                                                                                                     |
|       | In                                                                                                | 10             | 30                 | Aspirate 300 $\mu\text{L}$ of mixture                    |                                                                                                                                     |
|       | Out                                                                                               | 10             | 60                 | Dispense 620 $\mu\text{L}$ of mixture                    |                                                                                                                                     |
|       | In                                                                                                | 10             | 30                 | Aspirate 620 $\mu\text{L}$ of mixture                    |                                                                                                                                     |
|       | Out                                                                                               | 10             | 60                 | Dispense 620 $\mu\text{L}$ of mixture                    |                                                                                                                                     |
| 24-29 | In                                                                                                | 10             | 30                 | Aspirate 310 $\mu\text{L}$ of mixture                    | Aspirate and mix the mixture and <b>NP solution</b> through the mixing coil and the syringe for 3 cycles                            |
|       | In                                                                                                | 4              | 2                  | Aspirate 20 $\mu\text{L}$ of NP                          |                                                                                                                                     |
|       | In                                                                                                | 10             | 30                 | Aspirate 310 $\mu\text{L}$ of mixture                    |                                                                                                                                     |
|       | Out                                                                                               | 10             | 60                 | Dispense 640 $\mu\text{L}$ of mixture                    |                                                                                                                                     |
|       | In                                                                                                | 10             | 30                 | Aspirate 640 $\mu\text{L}$ of mixture                    |                                                                                                                                     |
|       | Out                                                                                               | 10             | 60                 | Dispense 640 $\mu\text{L}$ of mixture                    |                                                                                                                                     |
| 30    | Out                                                                                               | 10             | 60                 | Dispense 640 $\mu\text{L}$ of mixture                    | Mixture was retained in the mixing coil for 25 s                                                                                    |
| 31-33 | In                                                                                                | 10             | 30                 | Aspirate 740 $\mu\text{L}$ of mixture                    | The spectrophotometer was set to zero (100% transmittance). Discharge the bubbles and deliver the mixture to the flow cell for 30 s |
|       | Out                                                                                               | 12/11          | 60                 | Dispense 150 $\mu\text{L}$ /590 $\mu\text{L}$ of mixture |                                                                                                                                     |
| 34-39 | Repeat the steps 1-5, washing the syringe, mixing coil and the flow cell with sample for 2 cycles |                |                    |                                                          |                                                                                                                                     |

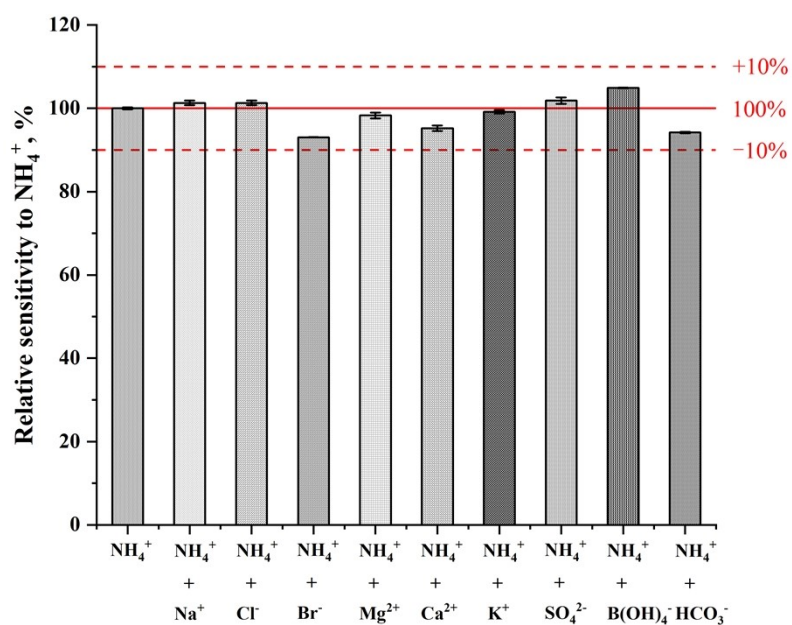

14

15 **Fig. S1** Influence of potential interference on the measurement of  $\text{NH}_4^+$  solutions.

16

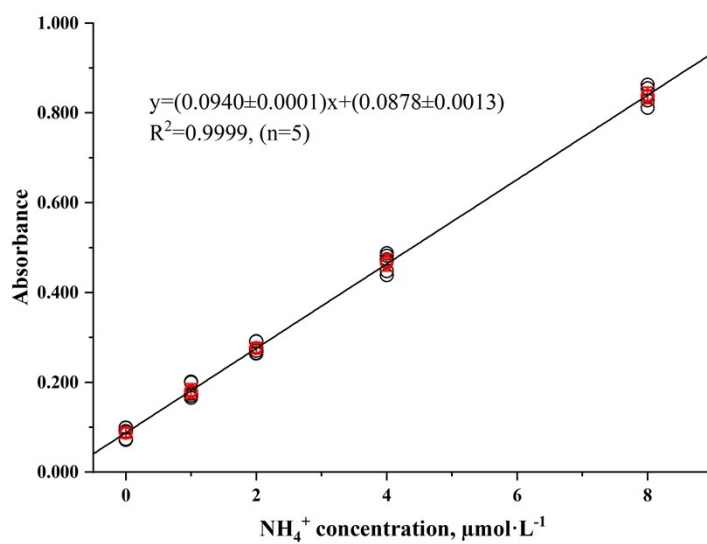

17

18 **Fig. S2** Calibration curve of the proposed method

19

20

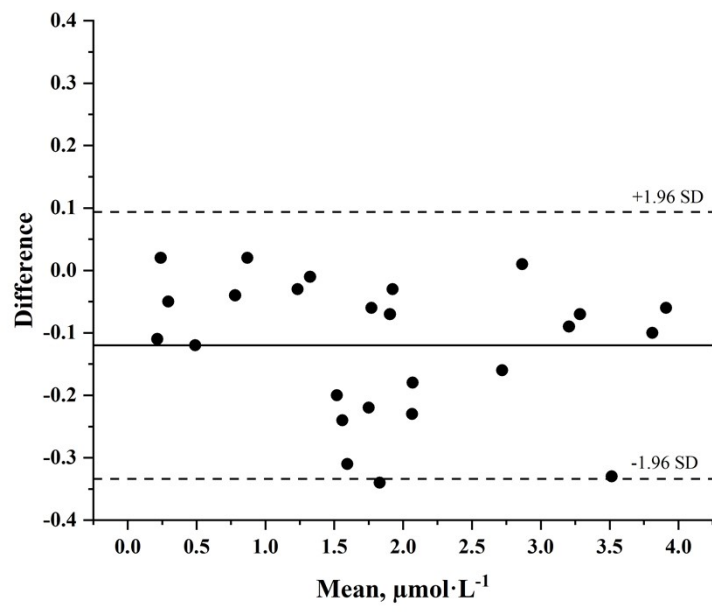

21

22

**Fig. S3** Bland-Altman analysis

23

24

25

26

27
